# Supplementary material
Source: MDPI journal article supplement (https://www.mdpi.com/2304-6740/4/2/8)
Supplement: s1 [file s1]

# Supplementary Materials: Hexacoordinate Silicon Compounds with a Dianionic Tetradentate (N,N',N',N)-Chelating Ligand

Daniela Gerlach, Erica Brendler and Jörg Wagler \*

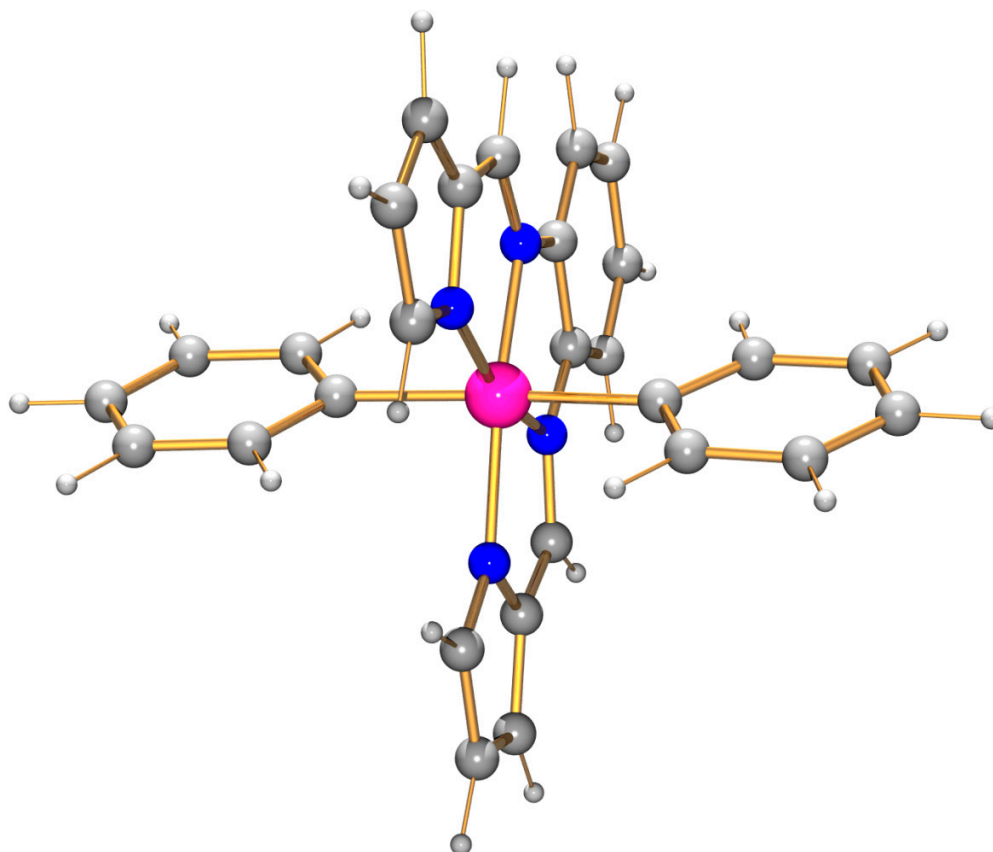

**Figure S1.** Molecular structure of **LSiPh<sub>2</sub>** optimized at the MPW1PW91/6–311G(d,p) level.

**Table S1.** Cartesian coordinates of the optimized (MPW1PW91/6–311G(d,p)) molecular structure of **LSiPh<sub>2</sub>** (55 atoms),  $E = -1558.77069689$  Hartree.

|   |          |           |           |
|---|----------|-----------|-----------|
| H | 5.875948 | −0.732293 | −0.000262 |
| H | 4.456530 | −2.770199 | −0.000031 |
| C | 4.795192 | −0.647800 | −0.000189 |
| C | 3.998915 | −1.786774 | −0.000054 |
| H | 4.789699 | 1.498807  | −0.000314 |
| C | 4.185486 | 0.597806  | −0.000220 |
| C | 2.616060 | −1.667769 | 0.000046  |
| H | 2.030586 | −2.581309 | 0.000173  |
| C | 2.797031 | 0.699256  | −0.000132 |
| C | 1.966805 | −0.427261 | −0.000004 |
| H | 2.369282 | 1.695531  | −0.000161 |
| H | 0.010652 | −3.626476 | −4.062236 |
| H | 0.010099 | −3.521990 | −1.367061 |
| C | 0.008014 | −2.732367 | −3.458822 |
| H | 0.010731 | −3.626609 | 4.062189  |
| C | 0.007791 | −2.688649 | −2.053500 |

---

|    |           |           |           |
|----|-----------|-----------|-----------|
| H  | 0.010069  | −3.522059 | 1.367025  |
| C  | 0.008117  | −2.732483 | 3.458800  |
| H  | 0.003368  | −1.066631 | −4.921716 |
| C  | 0.004301  | −1.418520 | −3.901740 |
| C  | 0.007794  | −2.688729 | 2.053480  |
| H  | 0.003571  | −1.066780 | 4.921732  |
| C  | 0.004428  | −1.418647 | 3.901748  |
| N  | 0.004089  | −1.426563 | −1.621576 |
| N  | 0.004133  | −1.426633 | 1.621581  |
| C  | 0.001862  | −0.616876 | −2.748277 |
| C  | 0.001985  | −0.616974 | 2.748307  |
| Si | 0.000997  | −0.347403 | 0.000015  |
| C  | −0.002012 | 0.761197  | 2.515082  |
| C  | −0.002120 | 0.761287  | −2.515004 |
| H  | −0.003982 | 1.480460  | 3.328023  |
| H  | −0.004157 | 1.480579  | −3.327919 |
| N  | −0.003200 | 1.122439  | 1.256043  |
| N  | −0.003230 | 1.122485  | −1.255951 |
| C  | −0.007007 | 2.396609  | 0.708258  |
| H  | −0.010693 | 3.613192  | 2.482811  |
| C  | −0.007020 | 2.396637  | −0.708118 |
| C  | −0.010636 | 3.604313  | 1.400012  |
| C  | −0.010654 | 3.604365  | −1.399832 |
| H  | −0.010716 | 3.613282  | −2.482630 |
| C  | −0.014207 | 4.799656  | 0.696493  |
| H  | −0.017032 | 5.737989  | 1.236972  |
| C  | −0.014214 | 4.799682  | −0.696269 |
| H  | −2.015929 | −2.592861 | 0.000109  |
| H  | −0.017047 | 5.738035  | −1.236712 |
| C  | −1.964308 | −0.438452 | 0.000007  |
| C  | −2.606536 | −1.682628 | 0.000053  |
| H  | −2.378801 | 1.682010  | −0.000098 |
| C  | −2.800906 | 0.683334  | −0.000068 |
| C  | −3.988694 | −1.809471 | 0.000010  |
| H  | −4.440720 | −2.795477 | 0.000047  |
| C  | −4.188760 | 0.574013  | −0.000100 |
| C  | −4.791407 | −0.675022 | −0.000062 |
| H  | −4.798072 | 1.471575  | −0.000155 |
| H  | −5.871669 | −0.765626 | −0.000092 |

---

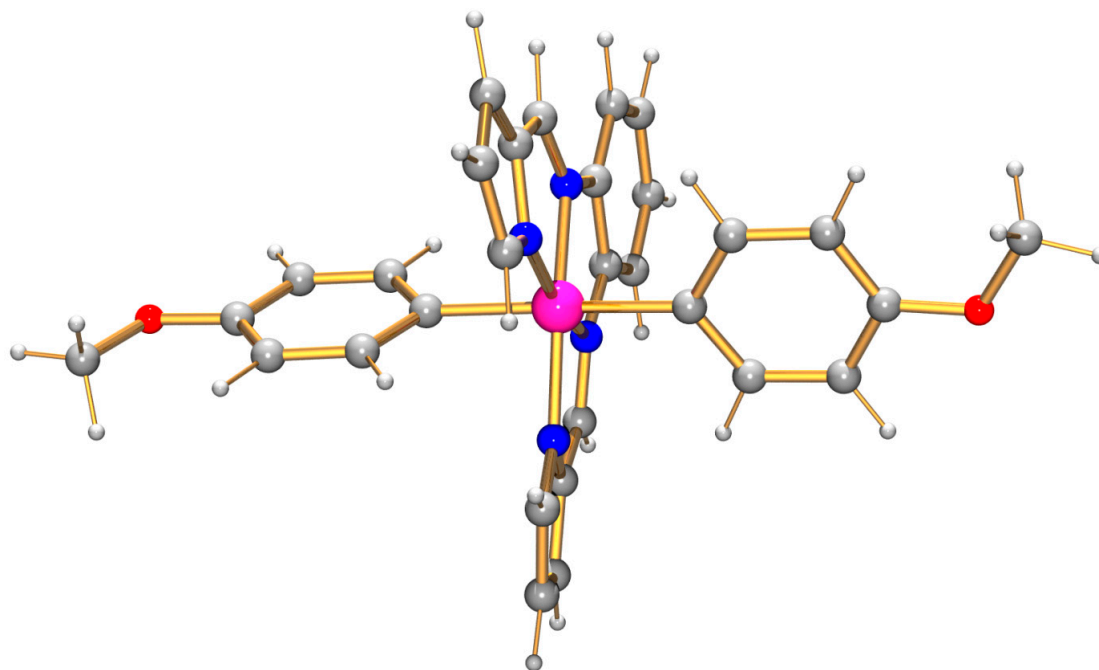

**Figure S2.** Molecular structure of **LSi(Anis)<sub>2</sub>** optimized at the MPW1PW91/6–311G(d,p) level.

**Table S2.** Cartesian coordinates of the optimized (MPW1PW91/6–311G(d,p)) molecular structure of **LSi(Anis)<sub>2</sub>** (63 atoms),  $E = -1817.81859329$  Hartree.

|   |           |           |           |
|---|-----------|-----------|-----------|
| H | −1.007894 | 5.626559  | −1.587800 |
| H | −0.902531 | 5.811870  | 0.876859  |
| C | −0.809233 | 4.747372  | −0.987646 |
| C | −0.749683 | 4.851739  | 0.399979  |
| H | −0.687330 | 3.444996  | −2.686963 |
| C | −0.626008 | 3.521137  | −1.608416 |
| H | −6.824163 | −0.347680 | −1.406024 |
| C | −0.507054 | 3.730945  | 1.179510  |
| H | −7.929167 | −1.226117 | −0.323289 |
| H | −0.477665 | 3.817460  | 2.258600  |
| C | −0.373389 | 2.388770  | −0.839685 |
| C | −6.901467 | −1.160850 | −0.675787 |
| H | −0.007862 | 1.346546  | −3.387967 |
| C | −0.313754 | 2.494575  | 0.570273  |
| H | −6.628314 | −2.104485 | −1.160853 |
| H | −4.657774 | −1.077504 | −1.846004 |
| O | −6.112598 | −0.914420 | 0.463209  |
| C | −0.006484 | 0.676290  | −2.533754 |
| N | −0.162312 | 1.099964  | −1.306683 |
| C | −4.112964 | −0.889040 | −0.930008 |
| C | −4.770458 | −0.792396 | 0.290911  |
| H | −2.264594 | −0.846685 | −1.955607 |
| C | −2.726892 | −0.750511 | −0.979988 |
| H | 2.137888  | 2.002901  | −0.219900 |
| N | −0.059823 | 1.287956  | 1.205129  |
| C | −4.019567 | −0.559010 | 1.441396  |
| H | −4.536716 | −0.492146 | 2.391209  |
| C | −1.938163 | −0.512911 | 0.148691  |
| H | 0.332186  | −1.306501 | −4.804821 |

---

|    |           |           |           |
|----|-----------|-----------|-----------|
| C  | 0.156126  | −0.709047 | −2.674085 |
| C  | −2.644950 | −0.425358 | 1.360064  |
| H  | 0.281753  | 1.843510  | 3.203550  |
| H  | 4.576894  | 2.066274  | −0.322409 |
| C  | 2.673735  | 1.061500  | −0.160314 |
| C  | 0.206257  | 1.052039  | 2.464177  |
| H  | −2.111423 | −0.258974 | 2.288647  |
| C  | 0.275227  | −1.586153 | −3.764155 |
| Si | 0.006368  | −0.276014 | 0.055402  |
| C  | 4.057001  | 1.120984  | −0.220444 |
| N  | 0.103178  | −1.440048 | −1.498231 |
| C  | 1.971492  | −0.144994 | −0.028823 |
| C  | 0.378738  | −0.297928 | 2.797946  |
| C  | 0.285696  | −2.867474 | −3.229491 |
| N  | 0.222198  | −1.196979 | 1.754535  |
| C  | 0.173019  | −2.728570 | −1.834964 |
| C  | 4.811492  | −0.047343 | −0.150717 |
| H  | 0.361403  | −3.799529 | −3.767300 |
| C  | 2.763128  | −1.291862 | 0.038191  |
| O  | 6.161147  | 0.102279  | −0.217732 |
| C  | 0.587859  | −1.003120 | 3.994393  |
| H  | 0.136168  | −3.508953 | −1.089803 |
| H  | 0.732371  | −0.570923 | 4.972511  |
| C  | 4.153423  | −1.266788 | −0.019889 |
| H  | 2.293561  | −2.265243 | 0.140973  |
| C  | 0.316010  | −2.420567 | 2.275674  |
| H  | 0.211910  | −3.303923 | 1.663656  |
| C  | 0.547360  | −2.349794 | 3.661020  |
| C  | 6.953832  | −1.058606 | −0.152670 |
| H  | 4.704633  | −2.196409 | 0.037960  |
| H  | 7.987037  | −0.723649 | −0.223481 |
| H  | 6.740605  | −1.741215 | −0.982705 |
| H  | 6.813921  | −1.591840 | 0.794152  |
| H  | 0.662871  | −3.191443 | 4.325783  |

---

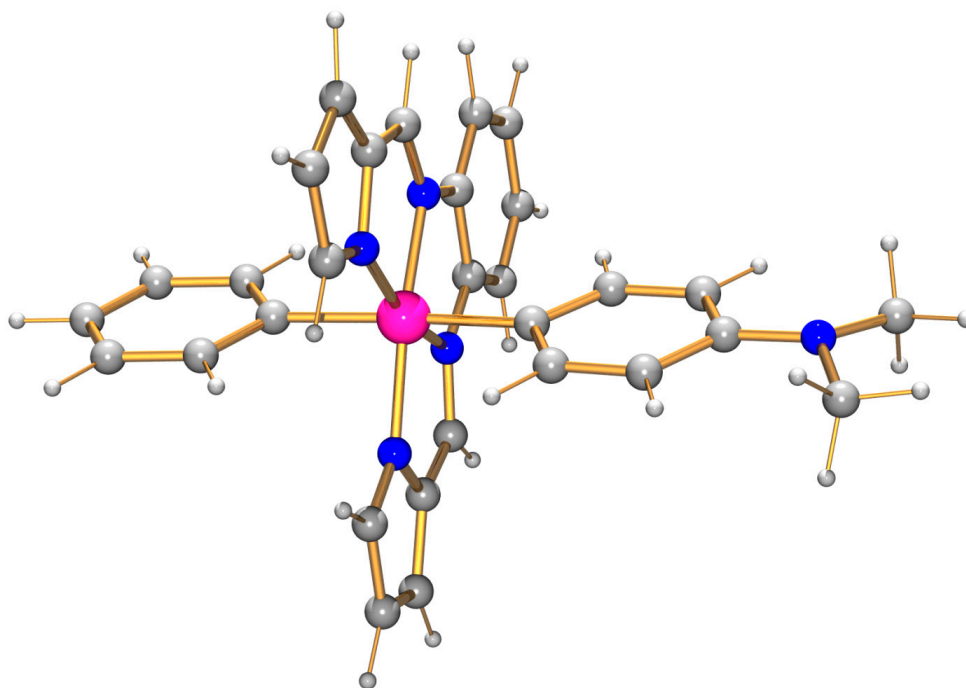

**Figure S3.** Molecular structure of **LSiPh(*p*-Me<sub>2</sub>N-C<sub>6</sub>H<sub>4</sub>)** optimized at the MPW1PW91/6–311G(d,p) level.

**Table S3.** Cartesian coordinates of the optimized (MPW1PW91/6–311G(d,p)) molecular structure of **LSiPh(*p*-Me<sub>2</sub>N-C<sub>6</sub>H<sub>4</sub>)** (63 atoms), *E* = −1722.73875481 Hartree.

|   |           |           |           |
|---|-----------|-----------|-----------|
| H | −1.295483 | 5.707855  | 1.224860  |
| H | −1.260546 | 5.705799  | −1.248852 |
| C | −1.185268 | 4.774708  | 0.686545  |
| C | −1.165555 | 4.773570  | −0.706064 |
| H | −1.080080 | 3.596732  | 2.475354  |
| C | −1.064551 | 3.586884  | 1.392636  |
| H | 5.963248  | 1.952208  | 0.654327  |
| C | −1.024882 | 3.584531  | −1.406389 |
| H | −1.009980 | 3.592453  | −2.489141 |
| H | 7.352470  | 1.062102  | 0.049119  |
| H | 3.921391  | 2.037546  | 0.071679  |
| C | 6.279016  | 1.201031  | −0.074132 |
| H | 6.096840  | 1.607005  | −1.080501 |
| C | −0.922575 | 2.385400  | 0.704260  |
| H | 1.535321  | 1.946642  | 0.033183  |
| C | −0.902409 | 2.384299  | −0.712186 |
| C | 3.450173  | 1.063680  | 0.071350  |
| H | −0.871520 | 1.477543  | 3.325989  |
| C | 2.062914  | 0.998996  | 0.046519  |
| N | 5.612333  | −0.056312 | 0.159669  |
| N | −0.789718 | 1.120140  | 1.255486  |
| C | −0.774412 | 0.762132  | 2.515328  |
| C | 4.228793  | −0.103041 | 0.095358  |
| H | 7.426062  | −1.051002 | 0.045564  |
| N | −0.754501 | 1.118055  | −1.257494 |
| H | −3.188329 | 1.406879  | −0.040399 |
| H | −0.776091 | 1.472878  | −3.329834 |
| C | 6.365240  | −1.262633 | −0.083726 |

|    |           |           |           |
|----|-----------|-----------|-----------|
| C  | 1.351489  | -0.204027 | 0.032231  |
| C  | -0.702623 | 0.758440  | -2.515828 |
| H  | 6.099981  | -2.040786 | 0.636409  |
| C  | -0.621999 | -0.606586 | 2.754007  |
| H  | 6.215537  | -1.670549 | -1.094592 |
| C  | 3.533545  | -1.324170 | 0.063140  |
| H  | -5.569789 | 0.928429  | -0.072537 |
| C  | -3.497253 | 0.367582  | -0.041122 |
| Si | -0.595717 | -0.342964 | 0.002666  |
| H  | -0.610966 | -1.046277 | 4.929842  |
| C  | 2.149409  | -1.353091 | 0.037764  |
| C  | -0.551055 | -1.399202 | 3.911954  |
| C  | -4.864389 | 0.104279  | -0.059564 |
| H  | 4.073342  | -2.261593 | 0.056705  |
| C  | -2.540588 | -0.653517 | -0.023666 |
| N  | -0.506882 | -1.414274 | 1.631780  |
| C  | -0.544273 | -0.610780 | -2.748078 |
| H  | 1.682524  | -2.333014 | 0.016225  |
| N  | -0.462061 | -1.416639 | -1.621779 |
| H  | -0.474811 | -1.054432 | -4.922030 |
| C  | -5.324176 | -1.204032 | -0.061236 |
| C  | -0.390292 | -2.705307 | 3.476170  |
| C  | -0.443417 | -1.405612 | -3.902253 |
| C  | -0.368346 | -2.665979 | 2.070359  |
| C  | -3.040564 | -1.961409 | -0.025552 |
| H  | -6.387560 | -1.414449 | -0.075565 |
| H  | -0.298261 | -3.591654 | 4.084115  |
| C  | -0.315374 | -2.669663 | -2.054183 |
| C  | -4.399864 | -2.241654 | -0.043969 |
| H  | -2.352770 | -2.800584 | -0.011758 |
| H  | -0.258024 | -3.495778 | 1.388495  |
| C  | -0.298079 | -2.711408 | -3.459917 |
| H  | -0.227485 | -3.498584 | -1.368012 |
| H  | -4.738966 | -3.272034 | -0.044592 |
| H  | -0.192022 | -3.599148 | -4.063534 |

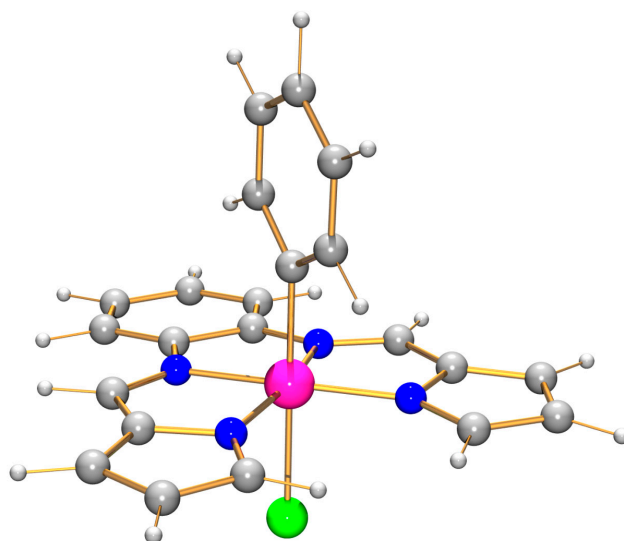

**Figure S4.** Molecular structure of **LSiPhCl** optimized at the MPW1PW91/6–311G(d,p) level.

**Table S4.** Cartesian coordinates of the optimized (MPW1PW91/6–311G(d,p)) molecular structure of **LSiPhCl** (45 atoms),  $E = -1817.41785613$  Hartree.

|    |           |           |           |
|----|-----------|-----------|-----------|
| H  | -1.763719 | -0.000368 | 5.230641  |
| H  | -3.514710 | -0.000744 | 3.472106  |
| C  | -1.486813 | -0.000324 | 4.182591  |
| C  | -2.465759 | -0.000488 | 3.196660  |
| H  | 0.625979  | 0.000013  | 4.565246  |
| C  | -0.150769 | -0.000072 | 3.808253  |
| C  | -2.102389 | -0.000323 | 1.856529  |
| H  | -2.894981 | -0.000429 | 1.114915  |
| H  | -3.608707 | 3.840478  | -1.395033 |
| H  | -3.609435 | -3.839667 | -1.395359 |
| C  | 0.197637  | 0.000041  | 2.461269  |
| H  | -3.378125 | 1.156266  | -1.314413 |
| C  | -2.717550 | 3.284524  | -1.150821 |
| C  | -0.764678 | -0.000056 | 1.445256  |
| H  | -3.378684 | -1.155567 | -1.313726 |
| C  | -2.612340 | 1.886377  | -1.106555 |
| C  | -2.718165 | -3.283910 | -1.151113 |
| H  | 1.253364  | 0.000204  | 2.212449  |
| C  | -2.612822 | -1.885772 | -1.106457 |
| H  | -1.173364 | -4.833365 | -0.785880 |
| C  | -1.465301 | 3.796805  | -0.837789 |
| H  | -1.172646 | 4.833744  | -0.785016 |
| C  | -1.465948 | -3.796388 | -0.838342 |
| N  | -1.369223 | 1.526330  | -0.775366 |
| N  | -1.369548 | -1.525904 | -0.775712 |
| C  | -0.635395 | -2.690801 | -0.611099 |
| C  | -0.635018 | 2.691091  | -0.610225 |
| Si | -0.324450 | 0.000063  | -0.453297 |
| C  | 0.723118  | -2.503823 | -0.332418 |
| H  | 1.416416  | -3.330552 | -0.223909 |
| C  | 0.723512  | 2.503824  | -0.331647 |
| N  | 1.096418  | -1.252977 | -0.241030 |
| N  | 1.096693  | 1.252920  | -0.240999 |
| H  | 1.416908  | 3.330441  | -0.222802 |
| C  | 2.360127  | -0.707114 | -0.072811 |
| C  | 2.360264  | 0.706783  | -0.072721 |
| H  | 3.563628  | -2.483644 | 0.079220  |
| C  | 3.555011  | -1.400921 | 0.084028  |
| C  | 3.555309  | 1.400331  | 0.084070  |
| H  | 3.564132  | 2.483055  | 0.079264  |
| C  | 4.738938  | -0.696920 | 0.242983  |
| C  | 4.739089  | 0.696083  | 0.242993  |
| H  | 5.669509  | -1.236996 | 0.364294  |
| H  | 5.669778  | 1.235951  | 0.364296  |
| Cl | 0.173896  | 0.000237  | -2.692010 |

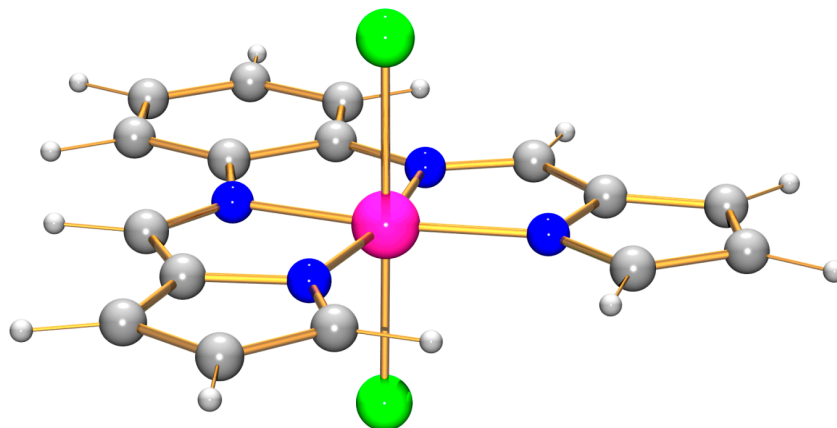

**Figure S5.** Molecular structure of  $\text{LSiCl}_2$  optimized at the MPW1PW91/6–311G(d,p) level.

**Table S5.** Cartesian coordinates of the optimized (MPW1PW91/6–311G(d,p)) molecular structure of  $\text{LSiCl}_2$  (35 atoms),  $E = -2046.05922426$  Hartree.

|    |           |           |           |
|----|-----------|-----------|-----------|
| H  | -3.932354 | 3.766252  | -0.000159 |
| H  | -3.932459 | -3.766200 | -0.001395 |
| H  | -3.642843 | 1.089550  | -0.001347 |
| C  | -2.998858 | 3.226773  | -0.000176 |
| H  | -3.643013 | -1.089535 | -0.000128 |
| C  | -2.862849 | 1.832709  | -0.000456 |
| C  | -2.998969 | -3.226715 | -0.000400 |
| C  | -2.862986 | -1.832668 | -0.000199 |
| H  | -1.438683 | -4.804931 | 0.000457  |
| C  | -1.716278 | 3.762734  | 0.000408  |
| H  | -1.438624 | 4.805017  | 0.001117  |
| C  | -1.716376 | -3.762657 | 0.000409  |
| N  | -1.568238 | 1.497667  | -0.000724 |
| N  | -1.568384 | -1.497561 | 0.001663  |
| C  | -0.836666 | -2.674427 | 0.001993  |
| C  | -0.836540 | 2.674508  | -0.000096 |
| Si | -0.479632 | -0.000011 | -0.000454 |
| C  | 0.551780  | -2.500423 | 0.001459  |
| H  | 1.250612  | -3.328604 | 0.002096  |
| C  | 0.551900  | 2.500448  | -0.000202 |
| N  | 0.938934  | -1.251210 | 0.000119  |
| N  | 0.938987  | 1.251206  | -0.000569 |
| H  | 1.250792  | 3.328579  | 0.000244  |
| C  | 2.214133  | -0.705769 | 0.000067  |
| C  | 2.214157  | 0.705727  | -0.000477 |
| H  | 3.425036  | -2.483559 | 0.000636  |
| C  | 3.417506  | -1.400976 | 0.000128  |
| C  | 3.417581  | 1.400855  | -0.000949 |
| H  | 3.425191  | 2.483433  | -0.001373 |
| C  | 4.611411  | -0.696633 | -0.000291 |
| C  | 4.611444  | 0.696441  | -0.000851 |
| H  | 5.549898  | -1.236385 | -0.000238 |
| H  | 5.549964  | 1.236153  | -0.001317 |
| Cl | -0.455451 | -0.001419 | -2.227585 |
| Cl | -0.453966 | 0.001425  | 2.227711  |



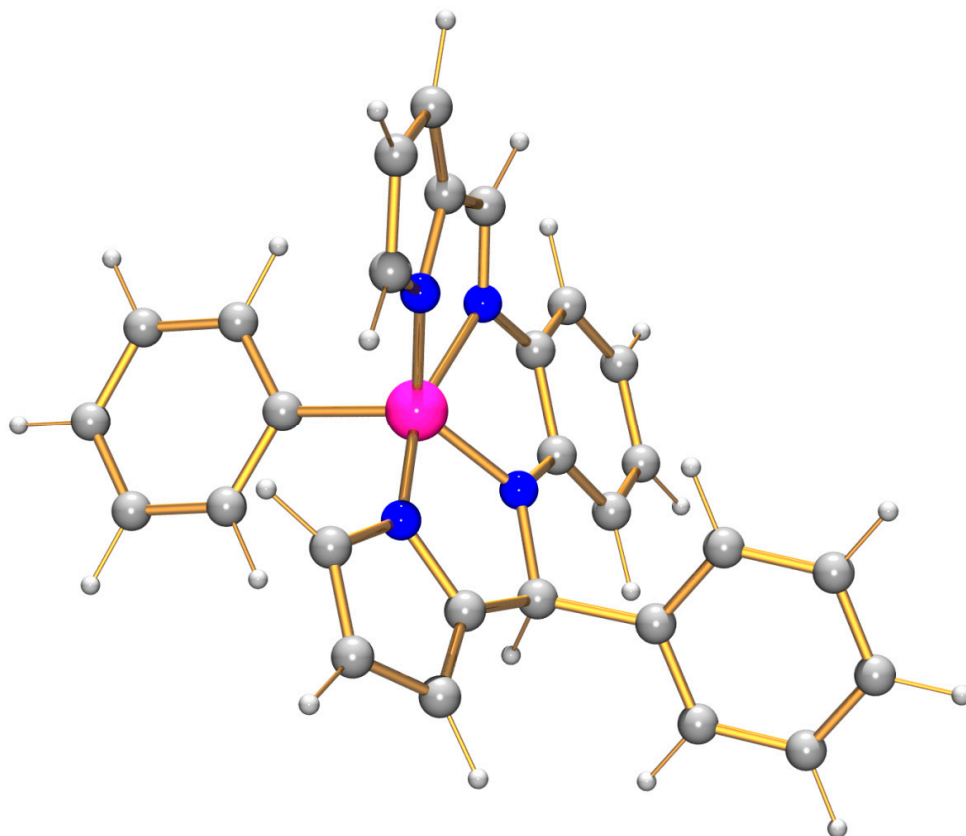

**Figure S6.** Molecular structure of  $L^{\text{Ph}}\text{SiPh}$  optimized at the MPW1PW91/6–311G(d,p) level.

**Table S6.** Cartesian coordinates of the optimized (MPW1PW91/6–311G(d,p)) molecular structure of  $L^{\text{Ph}}\text{SiPh}$  (55 atoms),  $E = -1588.82501610$  Hartree.

|    |           |           |           |
|----|-----------|-----------|-----------|
| H  | 0.711733  | 5.622790  | −0.283202 |
| H  | 2.488513  | 4.451290  | −1.538010 |
| C  | 0.738636  | 4.540938  | −0.303837 |
| C  | 1.733616  | 3.876902  | −1.014089 |
| H  | −1.015440 | 4.307750  | 0.927556  |
| C  | −0.226585 | 3.807947  | 0.377200  |
| C  | 1.786156  | 2.488023  | −1.071311 |
| H  | 2.580586  | 1.994880  | −1.614990 |
| C  | −0.178652 | 2.425561  | 0.325636  |
| C  | 0.820250  | 1.737918  | −0.403093 |
| H  | −1.775635 | 2.504415  | 2.641311  |
| N  | −1.006822 | 1.507391  | 0.962004  |
| C  | −1.634424 | 1.576802  | 2.094394  |
| N  | 0.713798  | 0.364548  | −0.342939 |
| H  | −3.559583 | 1.121050  | 0.200321  |
| H  | 1.788823  | −0.264636 | −2.029879 |
| C  | 1.680681  | −0.520865 | −0.965580 |
| C  | −2.022881 | 0.311310  | 2.591128  |
| H  | −5.364173 | 1.307069  | −1.442809 |
| C  | −3.449078 | 0.623606  | −0.756802 |
| Si | −0.859537 | −0.300955 | 0.178331  |
| H  | −3.119900 | 0.404825  | 4.503396  |
| C  | −2.659077 | −0.181691 | 3.723697  |
| C  | −4.476639 | 0.733438  | −1.684605 |

|   |           |           |           |
|---|-----------|-----------|-----------|
| C | -2.294902 | -0.117196 | -1.032320 |
| N | -1.547500 | -0.744562 | 1.832025  |
| C | 1.057895  | -1.885731 | -0.852379 |
| N | -0.187792 | -1.921004 | -0.274900 |
| H | 2.340609  | -3.429804 | -1.733387 |
| C | -4.365142 | 0.111559  | -2.921901 |
| C | -2.567868 | -1.578436 | 3.649354  |
| C | 1.413426  | -3.147138 | -1.259914 |
| C | -1.879006 | -1.884079 | 2.482091  |
| C | -2.208738 | -0.745177 | -2.281190 |
| H | -5.163280 | 0.200167  | -3.649979 |
| H | -2.937056 | -2.293136 | 4.367517  |
| C | -0.640989 | -3.216624 | -0.340501 |
| C | -3.227259 | -0.627030 | -3.218862 |
| H | -1.337825 | -1.345005 | -2.521445 |
| H | -1.580829 | -2.846670 | 2.100229  |
| C | 0.323427  | -3.995788 | -0.932507 |
| H | -1.630694 | -3.481722 | -0.005867 |
| H | -3.134003 | -1.119433 | -4.180018 |
| H | 0.253519  | -5.056997 | -1.116362 |
| C | 3.064061  | -0.460353 | -0.337440 |
| C | 4.195770  | -0.543820 | -1.142854 |
| C | 3.223473  | -0.360889 | 1.042398  |
| C | 5.468168  | -0.536930 | -0.581870 |
| H | 4.080901  | -0.614721 | -2.220061 |
| C | 4.491545  | -0.346730 | 1.604264  |
| H | 2.345333  | -0.290934 | 1.673601  |
| C | 5.618828  | -0.436770 | 0.794165  |
| H | 6.340470  | -0.603531 | -1.221712 |
| H | 4.602797  | -0.265769 | 2.679387  |
| H | 6.608705  | -0.425672 | 1.234828  |

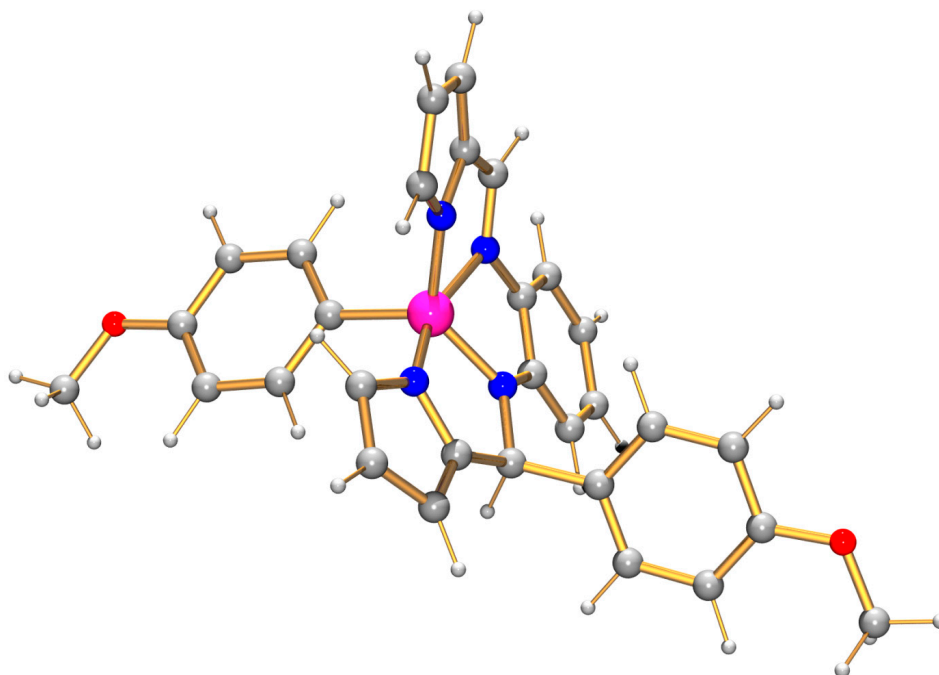

Figure S7. Molecular structure of  $L^{Ani}Si(Ani)$  optimized at the MPW1PW91/6–311G(d,p) level.

**Table S7.** Cartesian coordinates of the optimized (MPW1PW91/6–311G(d,p)) molecular structure of **L<sup>Anis</sup>Si(Anis)** (63 atoms), E = −1817.87393570 Hartree.

|    |           |           |           |
|----|-----------|-----------|-----------|
| H  | 0.443770  | 5.337356  | −1.892493 |
| H  | 1.889341  | 3.750271  | −3.115638 |
| C  | 0.485296  | 4.298265  | −1.592211 |
| C  | 1.293217  | 3.399625  | −2.281279 |
| H  | −0.919947 | 4.536081  | 0.025392  |
| C  | −0.275459 | 3.853650  | −0.516801 |
| C  | 1.357186  | 2.055831  | −1.927800 |
| H  | 2.006970  | 1.381202  | −2.468190 |
| C  | −0.215277 | 2.517828  | −0.159336 |
| C  | 0.594905  | 1.590799  | −0.857213 |
| H  | −1.216245 | 3.362921  | 2.332369  |
| N  | −0.854352 | 1.876131  | 0.895904  |
| C  | −1.195025 | 2.309351  | 2.069324  |
| N  | 0.532012  | 0.305983  | −0.363255 |
| H  | −3.487208 | 1.504400  | 0.786943  |
| H  | 1.189270  | −0.852465 | −1.984629 |
| C  | 1.340114  | −0.777540 | −0.897386 |
| C  | −1.432752 | 1.268664  | 2.996755  |
| H  | −5.624814 | 1.286635  | −0.401216 |
| C  | −3.602390 | 0.704688  | 0.064070  |
| Si | −0.869991 | −0.088024 | 0.673338  |
| H  | −2.046447 | 1.979465  | 4.993632  |
| C  | −1.773977 | 1.165535  | 4.339727  |
| C  | −4.811866 | 0.597783  | −0.594834 |
| C  | −2.545925 | −0.187346 | −0.172987 |
| N  | −1.133087 | 0.012372  | 2.498538  |
| C  | 0.779293  | −2.010635 | −0.243209 |
| N  | −0.296631 | −1.806195 | 0.584779  |
| H  | 1.847762  | −3.812866 | −0.887801 |
| C  | −5.007708 | −0.411649 | −1.539442 |
| C  | −1.680052 | −0.194427 | 4.665828  |
| C  | 1.050842  | −3.353854 | −0.323815 |
| C  | −1.282516 | −0.866245 | 3.516204  |
| C  | −2.773002 | −1.194275 | −1.114427 |
| H  | −1.856724 | −0.645703 | 5.629173  |
| C  | −0.731045 | −3.036594 | 1.015974  |
| C  | −3.978156 | −1.312373 | −1.799060 |
| H  | −1.994657 | −1.920555 | −1.320755 |
| H  | −1.068455 | −1.913524 | 3.379781  |
| C  | 0.081469  | −4.007501 | 0.481384  |
| H  | −1.610574 | −3.136976 | 1.630967  |
| H  | −4.100705 | −2.109483 | −2.520015 |
| H  | −0.011387 | −5.070223 | 0.645868  |
| C  | 2.829181  | −0.608579 | −0.654113 |
| C  | 3.743849  | −0.876758 | −1.660663 |
| C  | 3.317701  | −0.220869 | 0.595645  |
| C  | 5.117463  | −0.771032 | −1.447888 |
| H  | 3.387167  | −1.177737 | −2.641019 |
| C  | 4.673323  | −0.104014 | 0.823403  |
| H  | 2.618997  | −0.006663 | 1.395967  |

|   |           |           |           |
|---|-----------|-----------|-----------|
| C | 5.586784  | -0.381134 | -0.198126 |
| H | 5.799349  | -0.988244 | -2.258857 |
| H | 5.059619  | 0.198717  | 1.788677  |
| O | -6.220045 | -0.433595 | -2.140713 |
| O | 6.895755  | -0.238839 | 0.125208  |
| C | 7.854818  | -0.514007 | -0.868938 |
| H | 8.825112  | -0.345623 | -0.406332 |
| H | 7.794866  | -1.553159 | -1.210058 |
| H | 7.746396  | 0.154895  | -1.729567 |
| C | -6.464635 | -1.433847 | -3.103943 |
| H | -6.396403 | -2.436359 | -2.668957 |
| H | -7.479352 | -1.266597 | -3.458998 |
| H | -5.771025 | -1.358036 | -3.947766 |

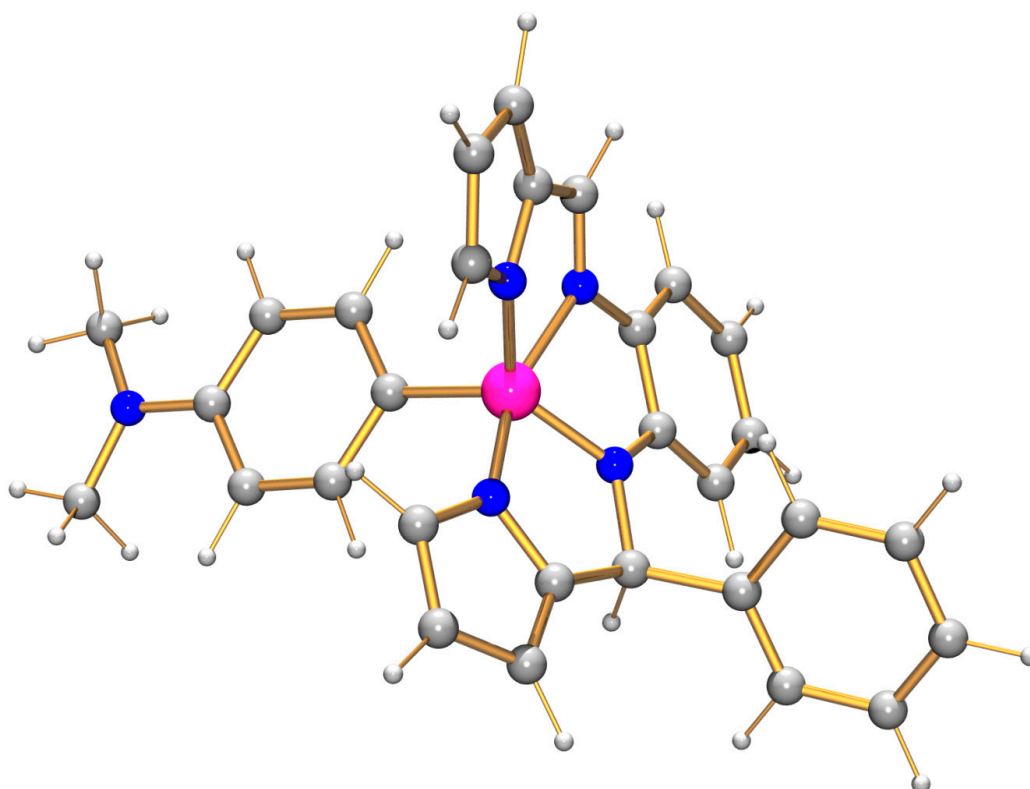

**Figure S8.** Molecular structure of  $L^{\text{PhSi}}(p\text{-NMe}_2\text{-C}_6\text{H}_4)$  optimized at the MPW1PW91/6–311G(d,p) level.

**Table S8.** Cartesian coordinates of the optimized (MPW1PW91/6–311G(d,p)) molecular structure of  $L^{\text{PhSi}}(p\text{-NMe}_2\text{-C}_6\text{H}_4)$  (63 atoms),  $E = -1722.79548056$  Hartree.

|   |           |          |           |
|---|-----------|----------|-----------|
| H | 1.026131  | 5.638204 | -0.175701 |
| H | 2.307202  | 4.554514 | -1.989593 |
| C | 1.082492  | 4.558642 | -0.230807 |
| C | 1.797686  | 3.943845 | -1.253430 |
| H | -0.136135 | 4.238247 | 1.518801  |
| C | 0.434358  | 3.778157 | 0.720024  |
| C | 1.877379  | 2.559002 | -1.358373 |
| H | 2.454309  | 2.106171 | -2.153392 |
| C | 0.510461  | 2.399755 | 0.621785  |
| C | 1.225699  | 1.760939 | -0.419311 |
| H | -0.185042 | 2.380982 | 3.348638  |

|    |           |           |           |
|----|-----------|-----------|-----------|
| N  | -0.018959 | 1.441680  | 1.479197  |
| C  | -0.213635 | 1.468123  | 2.760599  |
| N  | 1.194936  | 0.385034  | -0.358674 |
| H  | -2.629173 | 1.158720  | 1.479100  |
| H  | 1.656054  | -0.176691 | -2.326447 |
| C  | 1.921190  | -0.452323 | -1.294911 |
| C  | -0.357984 | 0.180265  | 3.326200  |
| H  | -4.853911 | 1.291488  | 0.582057  |
| C  | -2.849872 | 0.579602  | 0.589196  |
| Si | -0.097662 | -0.348324 | 0.639616  |
| H  | -0.724579 | 0.200521  | 5.502442  |
| C  | -0.541957 | -0.354884 | 4.595499  |
| C  | -4.133709 | 0.660834  | 0.079213  |
| C  | -1.854147 | -0.209546 | 0.002799  |
| N  | -0.135634 | -0.842784 | 2.421261  |
| C  | 1.418066  | -1.842551 | -1.015673 |
| N  | 0.441609  | -1.935655 | -0.055745 |
| H  | 2.385096  | -3.322385 | -2.313118 |
| C  | -4.499666 | -0.056028 | -1.075548 |
| C  | -0.429262 | -1.744806 | 4.455843  |
| C  | 1.661180  | -3.083799 | -1.549616 |
| C  | -0.177835 | -2.003653 | 3.113398  |
| C  | -2.227863 | -0.912279 | -1.150796 |
| H  | -0.498326 | -2.484696 | 5.237350  |
| C  | 0.040094  | -3.248068 | 0.004602  |
| C  | -3.501600 | -0.837352 | -1.686412 |
| H  | -1.502489 | -1.545182 | -1.650106 |
| H  | 0.004241  | -2.946676 | 2.624546  |
| C  | 0.776188  | -3.980702 | -0.895525 |
| H  | -0.769267 | -3.556907 | 0.646080  |
| H  | -3.719121 | -1.398902 | -2.584507 |
| H  | 0.687180  | -5.042180 | -1.069847 |
| C  | 3.432773  | -0.347239 | -1.167611 |
| C  | 4.229263  | -0.360501 | -2.308545 |
| C  | 4.044766  | -0.274680 | 0.081490  |
| C  | 5.615247  | -0.309389 | -2.207776 |
| H  | 3.760593  | -0.410493 | -3.286538 |
| C  | 5.426603  | -0.217130 | 0.184923  |
| H  | 3.428486  | -0.258650 | 0.972797  |
| C  | 6.217392  | -0.236205 | -0.959489 |
| H  | 6.222640  | -0.320631 | -3.105438 |
| H  | 5.890910  | -0.157283 | 1.162554  |
| N  | -5.778630 | -0.000844 | -1.580618 |
| C  | -6.066297 | -0.600955 | -2.861380 |
| H  | -5.849202 | -1.672965 | -2.853410 |
| H  | -7.126757 | -0.484461 | -3.078203 |
| H  | -5.496210 | -0.145030 | -3.682393 |
| C  | -6.724836 | 0.938816  | -1.029696 |
| H  | -7.685765 | 0.806972  | -1.524112 |
| H  | -6.879818 | 0.762897  | 0.038759  |
| H  | -6.412992 | 1.984373  | -1.160337 |
| H  | 7.296901  | -0.190786 | -0.876575 |

---

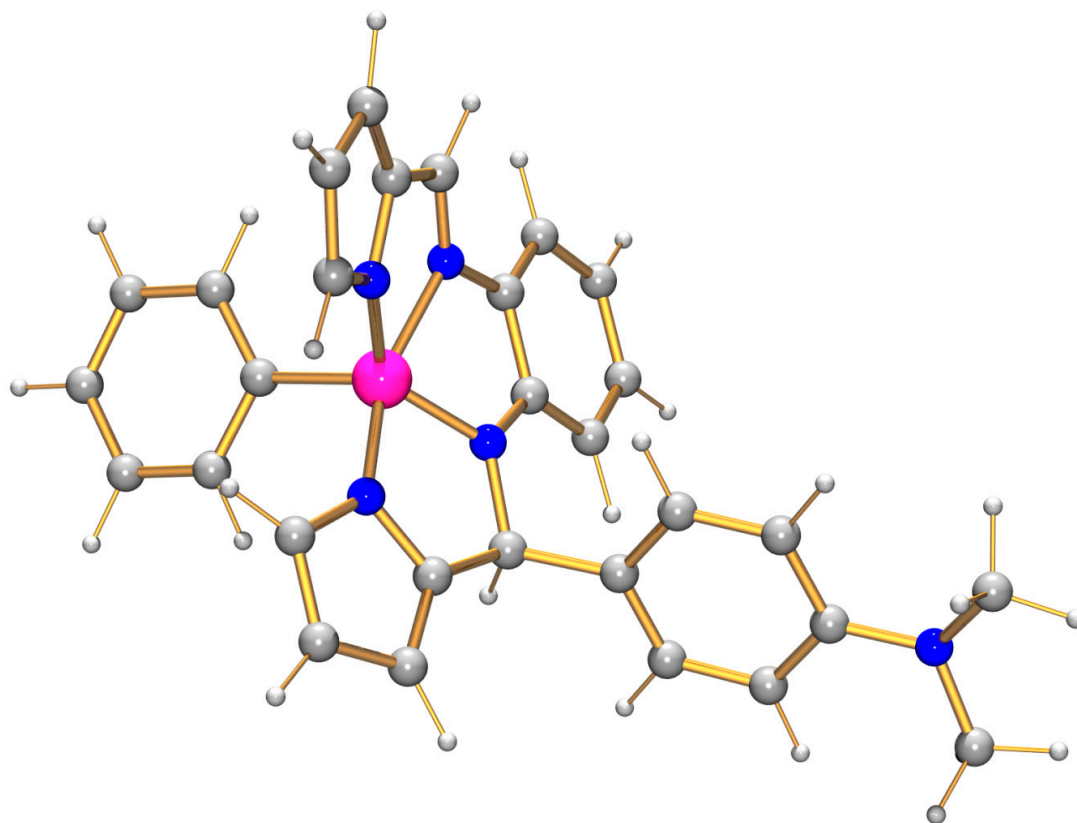

**Figure S9.** Molecular structure of  $L^{4-NMe_2-C_6H_4}SiPh$  optimized at the MPW1PW91/6–311G(d,p) level.

**Table S9.** Cartesian coordinates of the optimized (MPW1PW91/6–311G(d,p)) molecular structure of  $L^{4-NMe_2-C_6H_4}SiPh$  (63 atoms),  $E = -1722.79349632$  Hartree.

|    |           |           |           |
|----|-----------|-----------|-----------|
| H  | -0.276941 | 5.676743  | -0.095582 |
| H  | 1.411380  | 4.653432  | -1.581527 |
| C  | -0.206888 | 4.599675  | -0.177276 |
| C  | 0.738158  | 4.018711  | -1.017283 |
| H  | -1.816973 | 4.222539  | 1.205577  |
| C  | -1.066933 | 3.788822  | 0.554074  |
| C  | 0.843007  | 2.638844  | -1.155361 |
| H  | 1.598179  | 2.211068  | -1.800213 |
| C  | -0.966212 | 2.414319  | 0.422984  |
| C  | -0.017199 | 1.810274  | -0.435868 |
| H  | -2.347266 | 2.308485  | 2.874611  |
| N  | -1.688585 | 1.429135  | 1.086262  |
| C  | -2.215106 | 1.415480  | 2.270743  |
| N  | -0.059403 | 0.433259  | -0.440954 |
| H  | -4.272592 | 1.010588  | 0.514587  |
| H  | 0.837917  | -0.065933 | -2.269248 |
| C  | 0.870787  | -0.375814 | -1.213874 |
| C  | -2.501867 | 0.110454  | 2.734293  |
| H  | -6.223027 | 1.192629  | -0.952910 |
| C  | -4.236464 | 0.544673  | -0.463870 |
| Si | -1.542095 | -0.328986 | 0.197141  |
| H  | -3.420748 | 0.061196  | 4.739811  |
| C  | -3.008292 | -0.465102 | 3.892937  |

|   |           |           |           |
|---|-----------|-----------|-----------|
| C | -5.346458 | 0.652202  | -1.291864 |
| C | -3.092740 | -0.153688 | -0.865129 |
| N | -2.052182 | -0.884003 | 1.882697  |
| C | 0.319059  | -1.771378 | -1.103321 |
| N | -0.854148 | -1.894175 | -0.399711 |
| H | 1.563159  | -3.207468 | -2.194973 |
| C | -5.331417 | 0.071337  | -2.553730 |
| C | -2.861693 | -1.850889 | 3.739869  |
| C | 0.680728  | -2.993580 | -1.612457 |
| C | -2.270514 | -2.067422 | 2.501302  |
| C | -3.103856 | -0.740658 | -2.136921 |
| H | -6.194301 | 0.158615  | -3.204006 |
| H | -3.130653 | -2.615521 | 4.451131  |
| C | -1.257226 | -3.205692 | -0.485228 |
| C | -4.205854 | -0.624371 | -2.975115 |
| H | -2.242382 | -1.306658 | -2.473861 |
| H | -1.965544 | -2.995150 | 2.045929  |
| C | -0.330633 | -3.908212 | -1.217107 |
| H | -2.192996 | -3.533875 | -0.062945 |
| H | -4.186655 | -1.084772 | -3.956305 |
| H | -0.375264 | -4.961652 | -1.448134 |
| C | 2.312481  | -0.268632 | -0.755132 |
| C | 3.345070  | -0.176078 | -1.679964 |
| C | 2.657640  | -0.312934 | 0.592619  |
| C | 4.675365  | -0.127993 | -1.289525 |
| H | 3.111350  | -0.146852 | -2.740274 |
| C | 3.976901  | -0.258393 | 1.003482  |
| H | 1.874821  | -0.394002 | 1.338474  |
| C | 5.026913  | -0.153724 | 0.070422  |
| H | 5.438855  | -0.065807 | -2.052350 |
| H | 4.191543  | -0.300722 | 2.062218  |
| N | 6.344915  | -0.067330 | 0.476897  |
| C | 7.392421  | -0.193896 | -0.507124 |
| H | 8.357104  | -0.071518 | -0.017128 |
| H | 7.386789  | -1.167533 | -1.018296 |
| H | 7.312781  | 0.587636  | -1.267717 |
| C | 6.677453  | -0.332737 | 1.855915  |
| H | 6.164502  | 0.363592  | 2.524739  |
| H | 6.424874  | -1.355599 | 2.170518  |
| H | 7.747455  | -0.187429 | 1.996600  |

---
